# Supplementary material for: Mammalian target of rapamycin and Rictor control neutrophil chemotaxis by regulating Rac/Cdc42 activity and the actin cytoskeleton
Source: PubMed Central journal article supplement — Mol Biol Cell. 2013 Nov 1;24(21):3369–80. doi: 10.1091/mbc.E13-07-0405 (PMC3814157; doi:10.1091/mbc.e13-07-0405), 2013-11-01
Supplement: supp_E13-07-0405_CombinedSupMats.pdf [file supp_E13-07-0405_CombinedSupMats.pdf]

# Supplemental Materials

*Molecular Biology of the Cell*

He et al.

## Supplementary Material

### Supplementary Figure Legends

Figure S1. (A) Western blotting of mTOR, Rictor and Raptor in undifferentiated HL-60 cells (uHL-60), differentiated HL-60 cells (dHL-60) and human primary neutrophils ( $1^{\circ}$  neutrophil). GAPDH was a loading control. (B) Outlines (top) and migration speeds (bottom) of cells responding to the fMLP stimulation in the microfluidic chamber, as shown in Figure 2C. Each set of outlines represents a single cell observed at indicated intervals (denoted by different colors) after exposure to fMLP, and two representative cells are shown for each condition. Values for migration speeds are mean  $\pm$  SEM ( $n > 40$ ). (C) Cells containing non-target (NT) shRNA, mTOR shRNA-3, Rictor shRNA-1 or Raptor shRNA-1 were allowed to migrate toward chemoattractant-containing micropipette (fMLP, 10  $\mu$ M) on a fibrinogen-coated substrate. The two images in each row show the positions of individual cells (identified with a superimposed letter) after exposure to fMLP. Bar, 10  $\mu$ m. Movies for control and Rictor-depleted cells are available as Movie S4 and Movie S5. (D) Apoptotic assay of control cells or mTOR and Rictor-depleted cells. Cells were infected with lenti-viral particles containing NT shRNA, mTOR shRNA-3 or Rictor shRNA-1 and differentiated for 5 days. Cells were prepared according to the manufacturer's instructions (FITC Annexin V Apoptosis Detection Kit I, BD Pharmingen) and analyzed by flow cytometry. (E) Flow cytometry analysis of surface expression of  $\beta$ 2 integrin in control, mTOR- and Rictor-depleted cells after fMLP stimulation (100 nM, 10 min). The black line indicates background fluorescence from the isotype control IgG. (F) Analysis of intracellular  $[Ca^{2+}]$  in cells containing NT shRNA or Rictor shRNA in response to fMLP stimulation. Fluorescence was recorded using SpectraMax M2 spectrometer (excitation: 340-380 nm; emission: 510 nm). Results are plotted as emission ratio vs. time. Arrow indicates the time of addition of fMLP (100 nM). A representative experiment from eight separate experiments is shown.

Figure S2. (A) Western blotting of phosphorylated AKT (p-T308) in dHL-60 cells with or without Rictor depletion. Cells were stimulated with 100 nM fMLP for 1 minute or unstimulated. Total AKT was the loading control for each condition. The Rictor blot is also shown. (B) Western blotting of mSin1 in dHL-60 with or without the treatment of mSin1 shRNAs.  $\alpha$ -tubulin was a loading control. (C) Cells containing NT shRNA, mSin1 shRNA-1 or mSin1 shRNA-2 were allowed to migrate toward chemoattractant-containing micropipette (fMLP, 10  $\mu$ M) on a fibrinogen-coated substrate. The three images in each row show the positions of individual cells after exposure to fMLP for indicated times. Bar, 10  $\mu$ m. (D) Top: Western blotting of AKT (p-S473) phosphorylation in cells with or without mSin1 depletion. Cells were stimulated with fMLP (100 nM) for 1 min. Total AKT was a loading control. Bottom: Quantification of relative levels of p-S473 AKT in cells with and without mSin1 depletion. Each bar represents the mean  $\pm$  SEM ( $n=4$ ). Values are normalized to the level of p-S473 AKT (=100%) in cells treated with NT shRNA.

Figure S3. (A) dHL-60 cells were stimulated by fMLP (100 nM) for indicated times in suspension and lysed. AKT phosphorylation at serine 473 (p-S473) was assessed by western blotting. Total AKT was a loading control. (B) Quantification of relative p-S473 AKT levels after fMLP stimulation for indicated times. Values are normalized to the

level in cells 60 sec after fMLP stimulation (=100%) and are means $\pm$ SEM (n=4). (C) Western blotting of p-S473 AKT and total AKT in cells with or without Rictor depletion. dHL-60 cells were stimulated with 100 nM of fMLP for 1 or 5 min in suspension and lysed. The blot for Rictor is also shown. (D) Quantification of relative p-S473 AKT levels in dHL-60 cells with or without Rictor depletion 1 min after fMLP stimulation. Each bar represents the mean $\pm$ SEM (error bars, n=4). Values are normalized to the level of p-S473 AKT in cells without fMLP stimulation (\*, p<0.001). (E) Western blotting of p-S473 AKT and p-T308 AKT in dHL-60 cells treated with AKTi-1/2 of indicated concentrations. Cells were pretreated with AKTi-1/2 for 30 min, stimulated with 100 nM fMLP for 1 minute and lysed. Total AKT was used as a loading control. (F) The number of polarized cells with or without AKTi-1/2 treatment (1  $\mu$ M) in an fMLP gradient produced by the microfluidic device. 51 control cells and 43 AKTi-1/2 treated cells were analyzed. Values are normalized to the number (100%) of cells without AKTi-1/2 treatment. (G) Migration speeds of control and AKTi-1/2 treated dHL-60 cells (1  $\mu$ M) in an fMLP gradient produced by the microfluidic device. 42 control cells and 39 AKTi-1/2 treated cells were analyzed.

Figure S4. (A) Quantification of S6K1 phosphorylation (p-T389) in dHL-60 cells with or without rapamycin or Torin1 treatment. The values are normalized to the level of S6K1 phosphorylation 5 min after stimulation and are means  $\pm$  SEM (n = 4). (B) Quantification of AKT phosphorylation (p-S473) in dHL-60 cells with or without rapamycin or Torin1 treatment. The values are normalized to the level of AKT phosphorylation in control cells 1 min after fMLP stimulation and are means  $\pm$  SEM (n = 4).

Figure S5. (A) Quantification of F-actin levels in suspended dHL-60 cells. Cells with or without mTOR depletion were stimulated with fMLP (100 nM) for various times in suspension and fixed for staining with fluorescently-labeled phalloidin. Fluorescence in stained cells was determined by flow cytometry. Values are mean  $\pm$  SEM (n = 4). (B) Western blotting of Rictor in differentiated PLB-985 (dPLB-985) cells transfected with Rictor or non-targeting (NT) shRNAs. GAPDH was a loading control. PLB-985 cells were infected with lentiviruses containing the various shRNAs and were differentiated for 5 d in the presence of DMSO. (C-D) Quantification of F-actin levels in suspended dPLB-985 cells. Cells with or without Rictor depletion were stimulated with 100 nM (C) or 1  $\mu$ M fMLP (D) for various times in suspension and fixed for staining with fluorescently-labeled phalloidin. Fluorescence in stained cells was determined by flow cytometry. Values are mean  $\pm$  SEM (n = 4).

Figure S6. (A) The levels of Rac-GTP in suspended dHL-60 cells with or without mTOR depletion. Cells were stimulated with 100 nM of fMLP for 30 sec and lysed for the pull-down assay. Levels of total Rac were used to show cell lysate input. (B) Quantification of relative levels of Rac-GTP level with and without mTOR depletion. Each bar represents the mean $\pm$ SEM (error bars). Values are normalized to the level of Rac-GTP (=100%) in cells without mTOR depletion (\*, p<0.001). (C) The levels of Cdc42-GTP in dHL-60 cells with or without mTOR depletion. dHL-60 cells with or without mTOR depletion were stimulated with 100 nM of fMLP for 30 sec in suspension and lysed for the pull-down assay. Levels of total Cdc42 were used to show cell lysate input. (D) Quantification

of relative levels of Cdc42-GTP with and without mTOR depletion. Each bar represents the mean $\pm$ SEM (n=4). Values are normalized to the level of Cdc42-GTP (=100%) in cells without Rictor depletion (\*, p<0.001).

Figure S7. (A) Quantification of RhoA-GTP in suspended dHL-60 cells with or with Rictor depletion. Cells were stimulated with fMLP (100 nM) for times indicated and lysed. The level of RhoA-GTP was determined by the use of an absorbance-based RhoA G-LISA kit. The y axis represents the normalized level of RhoA-GTP. Each bar represents the mean  $\pm$  SEM (error bars) (n=4). Student's t test was performed. The asterisk indicates that the level of Rictor-depleted cells differ statistically from the control cells (\*, p < 0.01). (B) Quantification of RhoA-GTP in adherent dHL-60 cells with or with Rictor depletion. Cells were plated on fibrinogen-coated plates for 30 minutes. Cells were then stimulated by 100 nM fMLP for indicated times and lysed. The level of RhoA-GTP was determined as described above. Each bar represents the mean  $\pm$  SEM (error bars) (n=4). (C) Western blotting of Rictor and RhoGDI2 in dHL-60 cells with or without Rictor depletion. Two separate Rictor shRNAs were used.  $\alpha$ -tubulin was a loading control

### **Text for Supplementary Movies**

Supplementary Movie S1 shows the responses of control dHL-60 cells (NT shRNA) to a gradient of fMLP generated by the microfluidic device. Two time points are shown in Figure 2C.

Supplementary Movie S2 shows the responses of dHL-60 cells with mTOR depletion (mTOR shRNA-3) to a gradient of fMLP generated by the microfluidic device. Two time points are shown in Figure 2C.

Supplementary Movie S3 shows the responses of dHL-60 cells with Rictor depletion (Rictor shRNA-1) to a gradient of fMLP generated by the microfluidic device. Two time points are shown in Figure 2C.

Supplementary Movie S4 shows the responses of dHL-60 cells to a gradient of fMLP generated by the micropipette. Two time points are shown in Figure S1C.

Supplementary Movie S5 shows the responses of dHL-60 cells with Rictor depletion (Rictor shRNA-1) to a gradient of fMLP generated by the micropipette. Two time points are shown in Figure S1C.

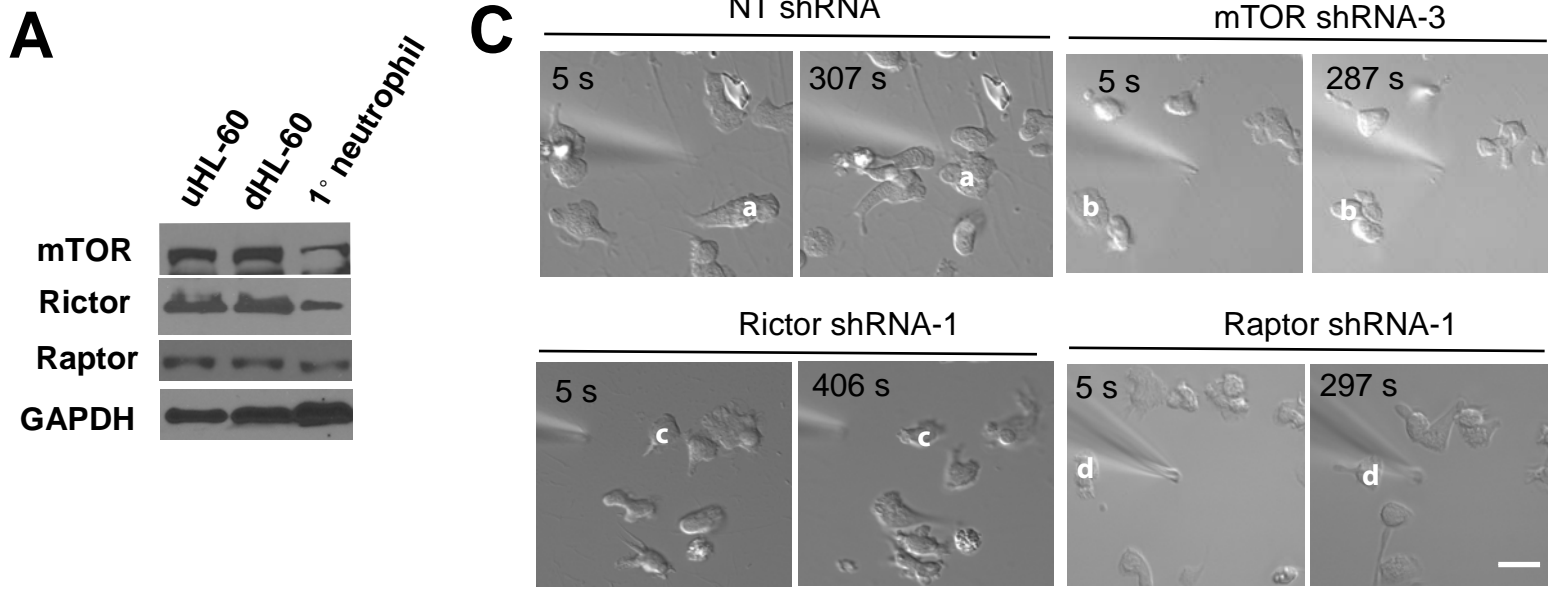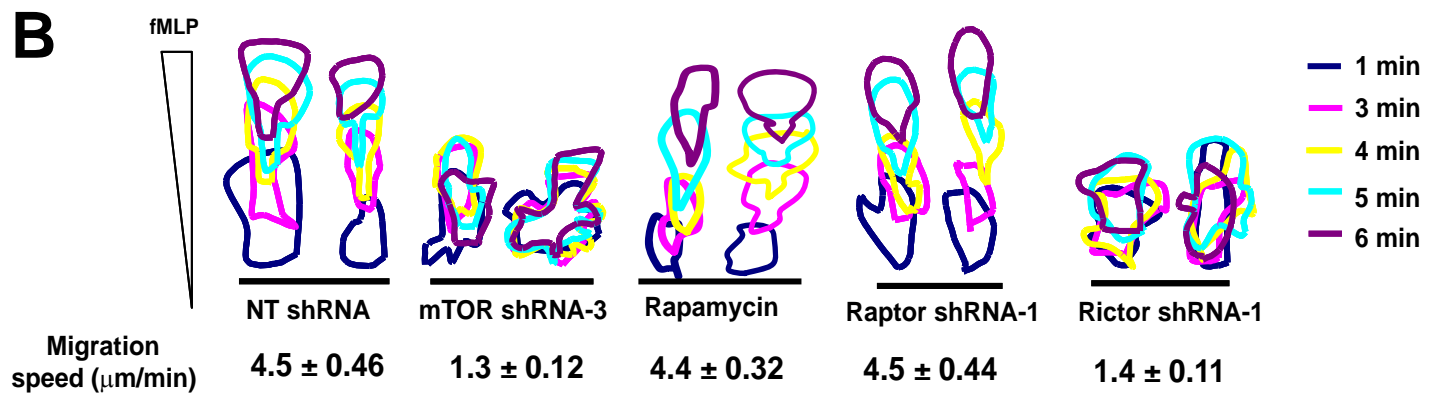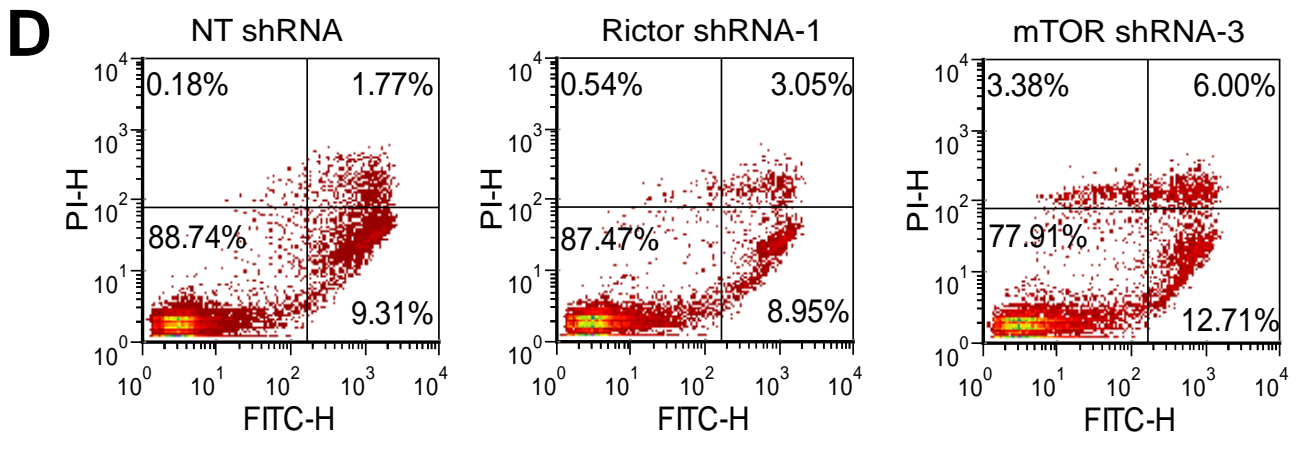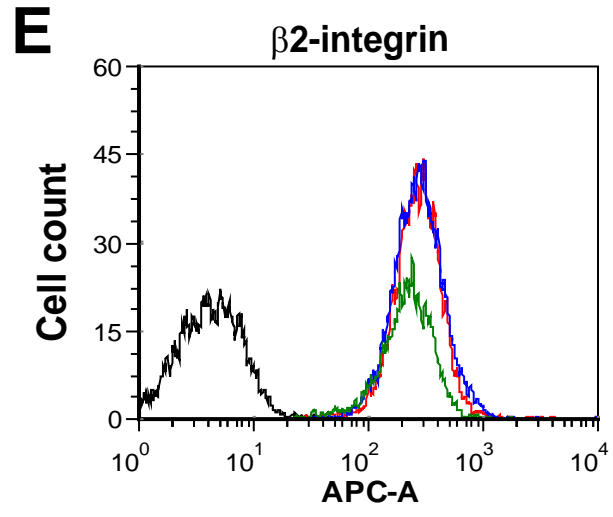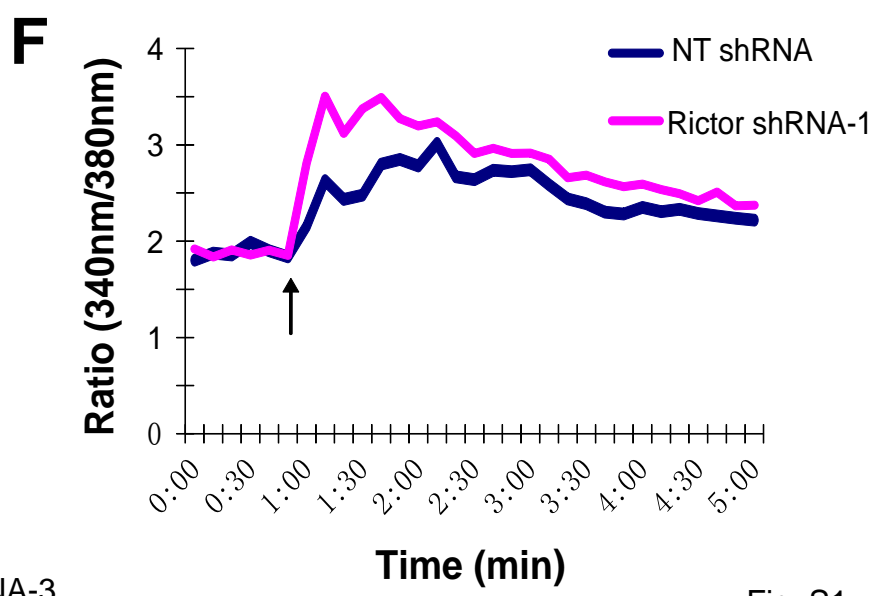

Fig. S1

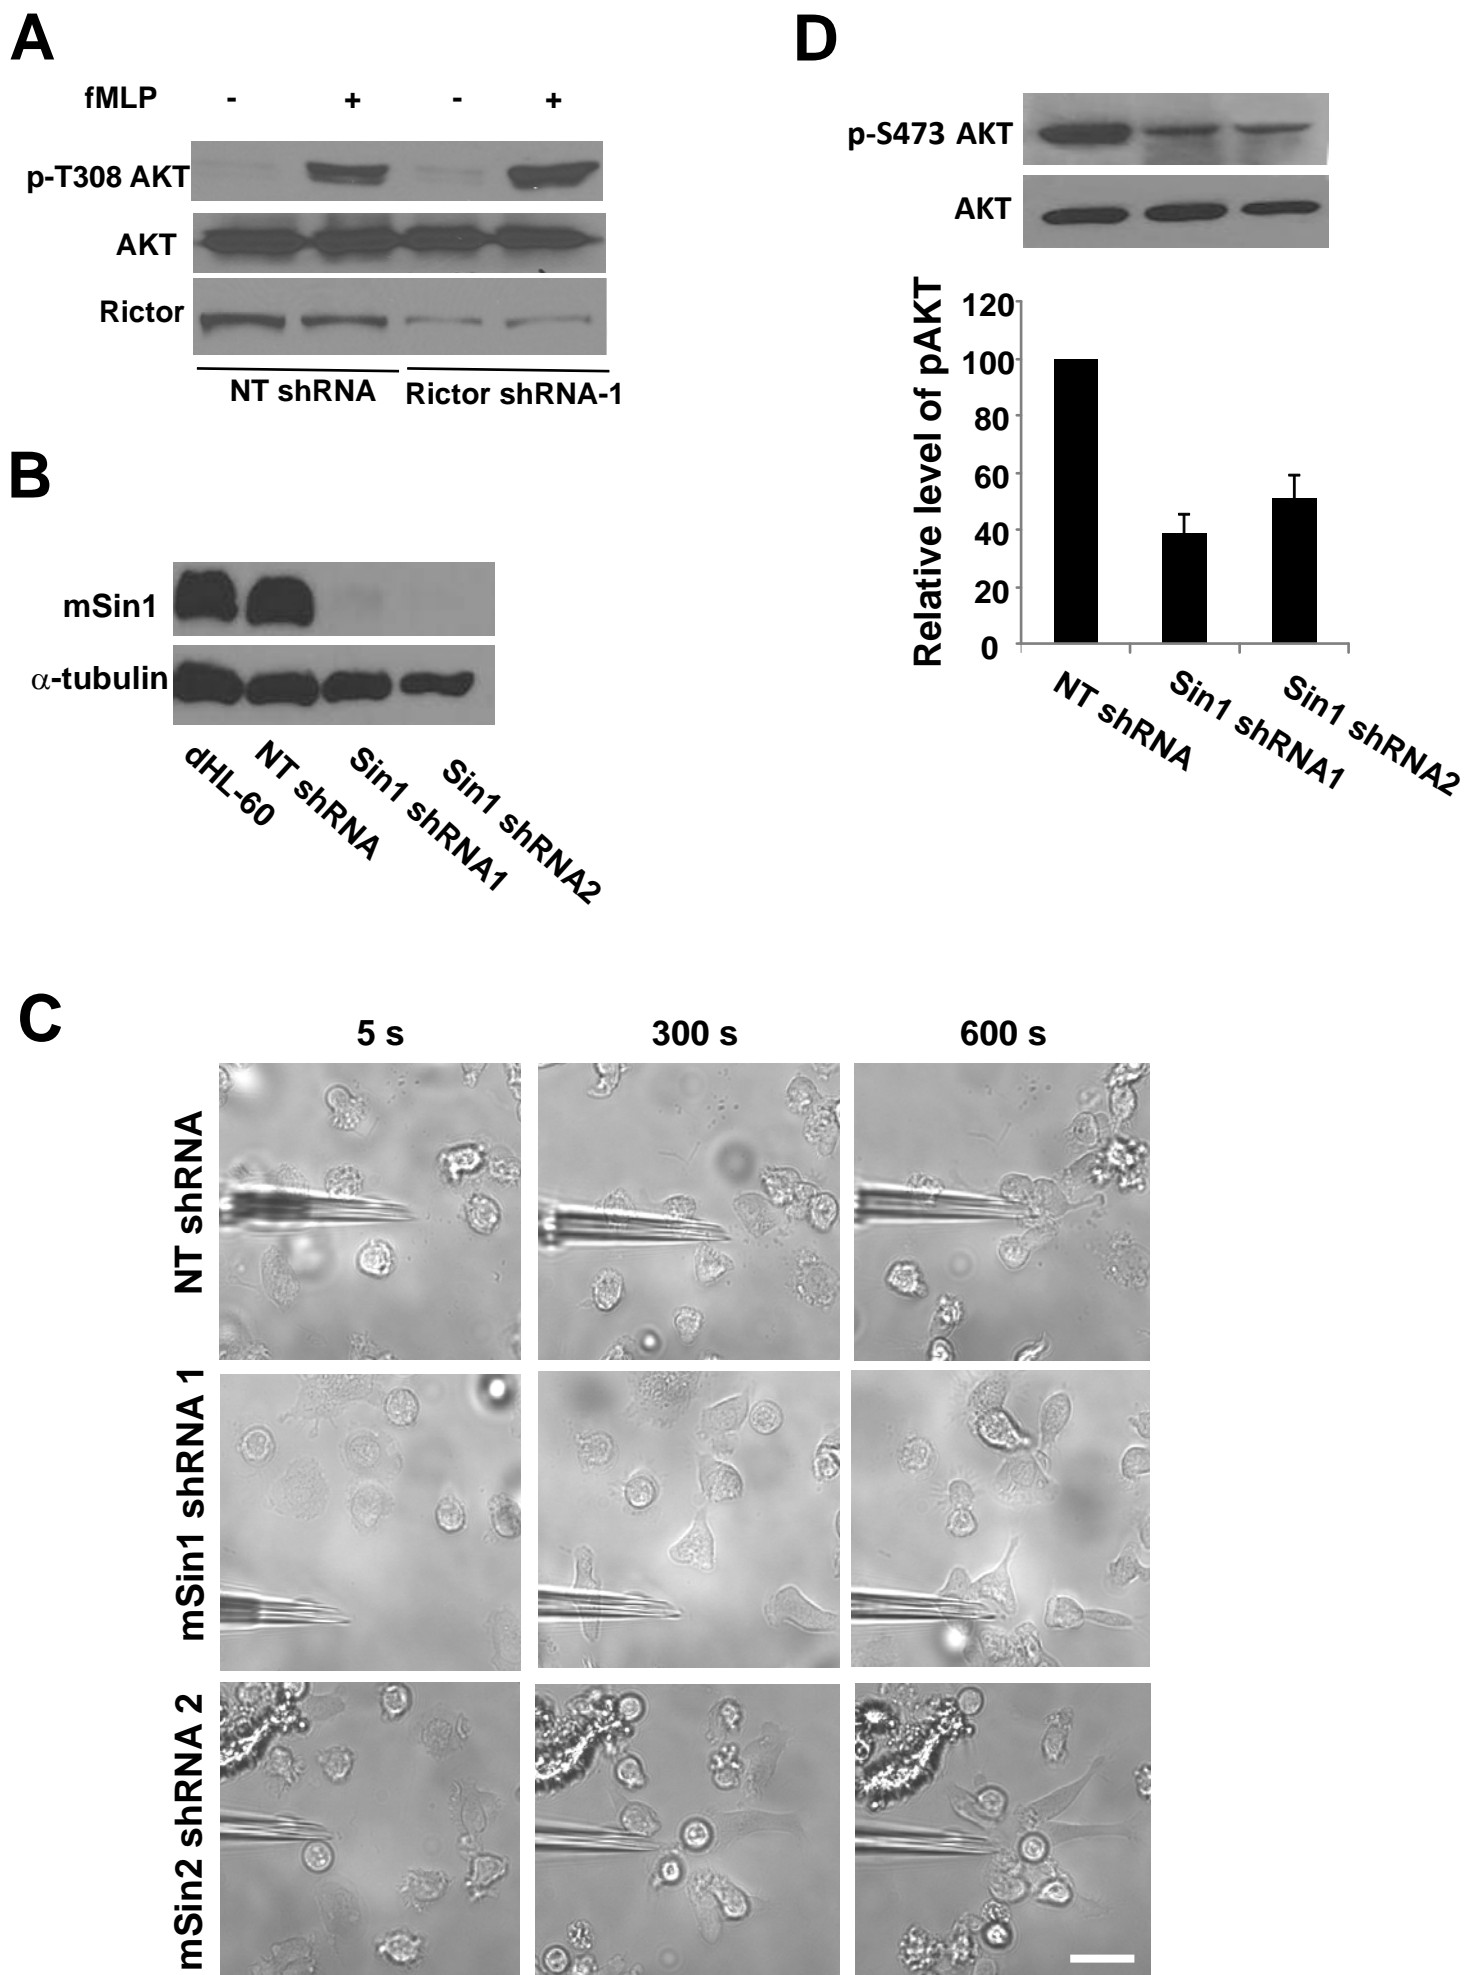

Fig. S2

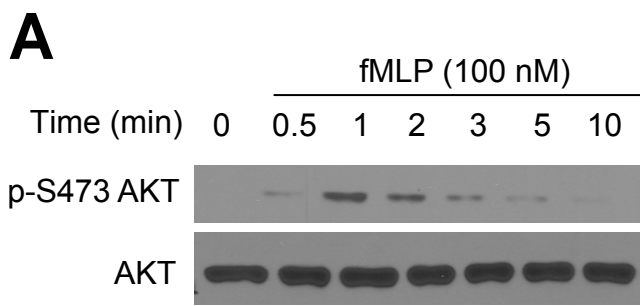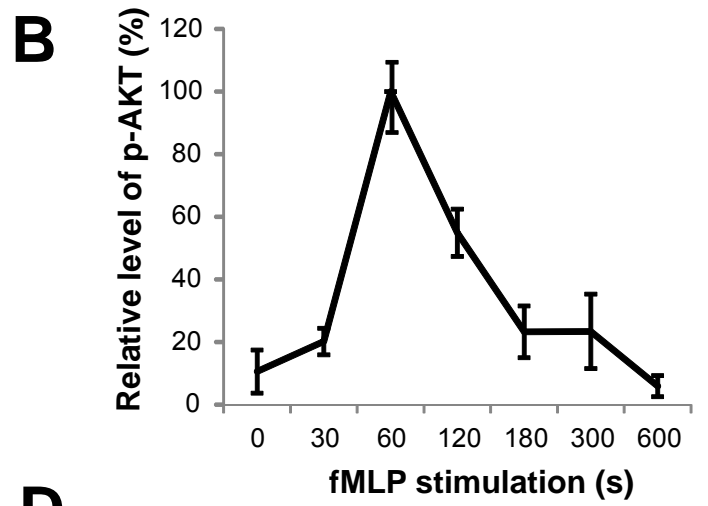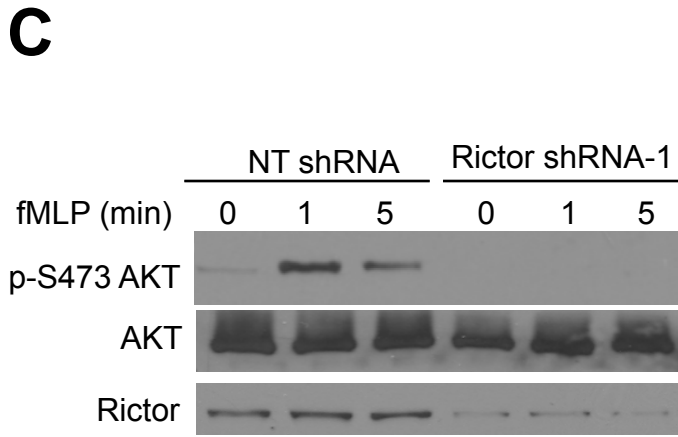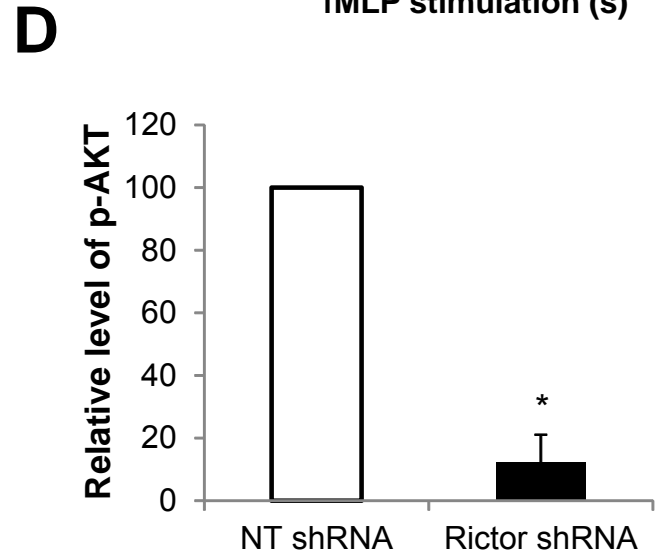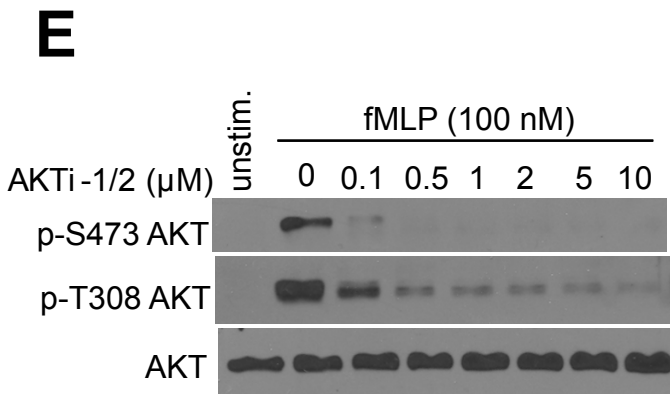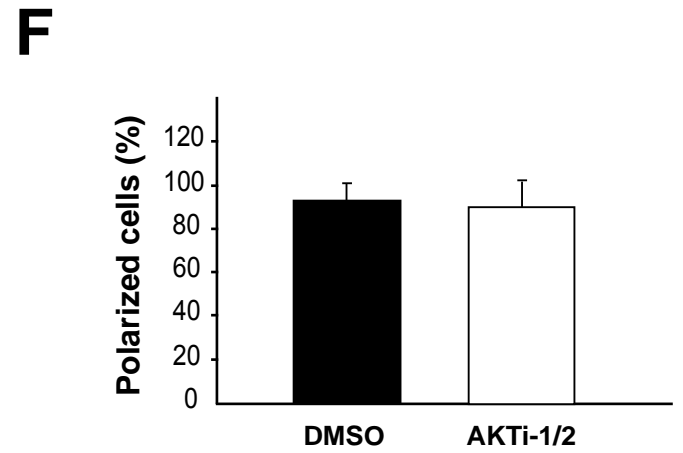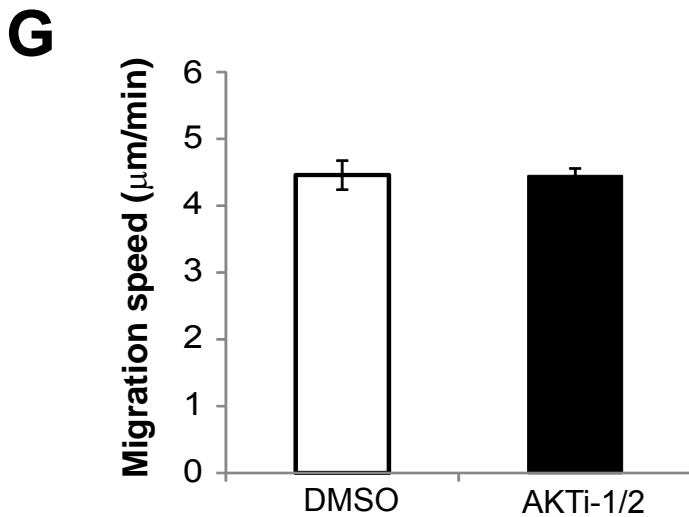

Fig. S3



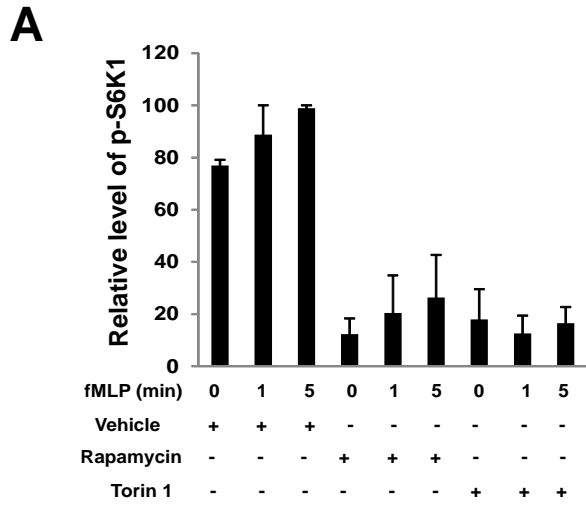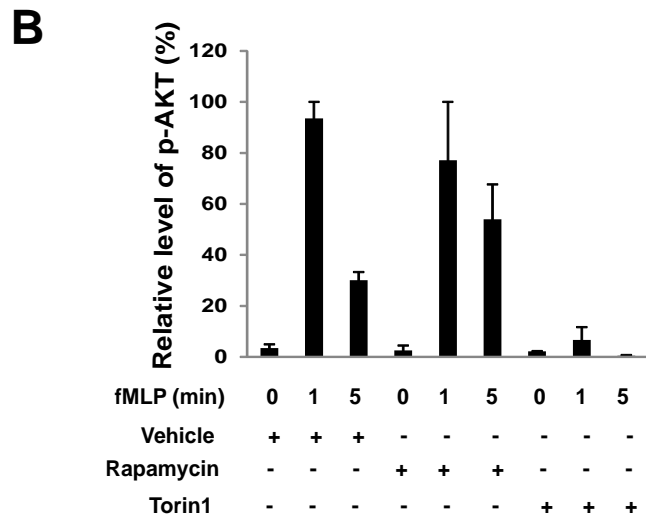

Fig. S4

**A**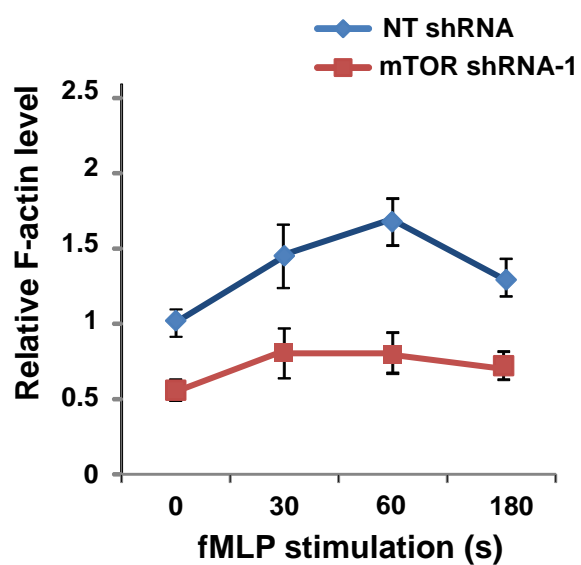**C**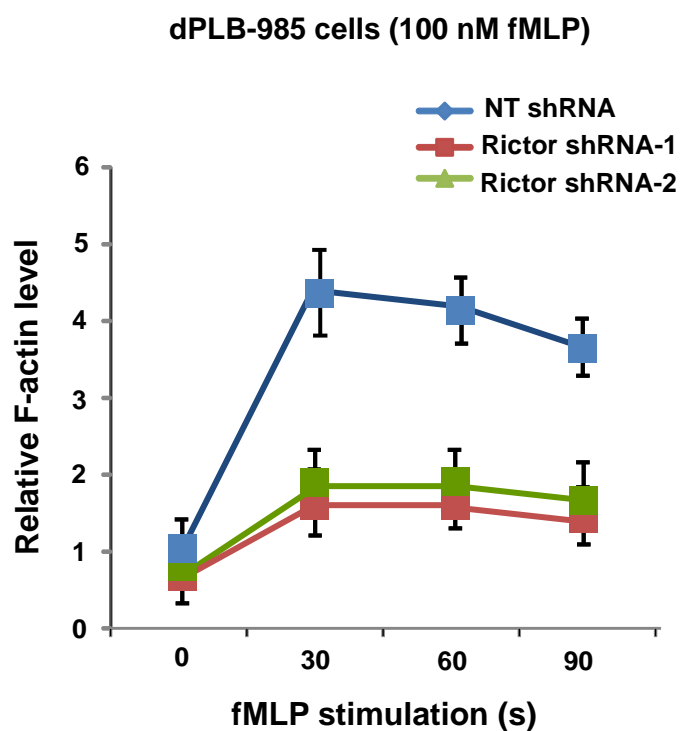**B**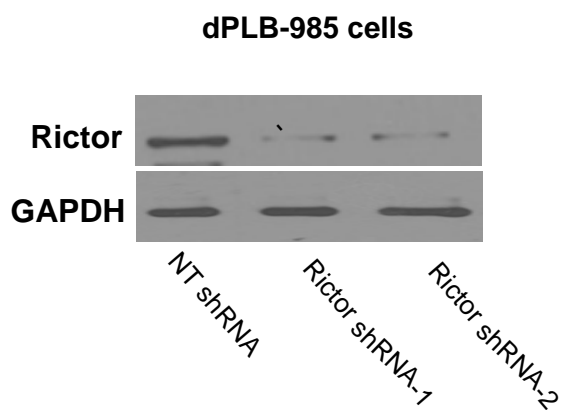**D**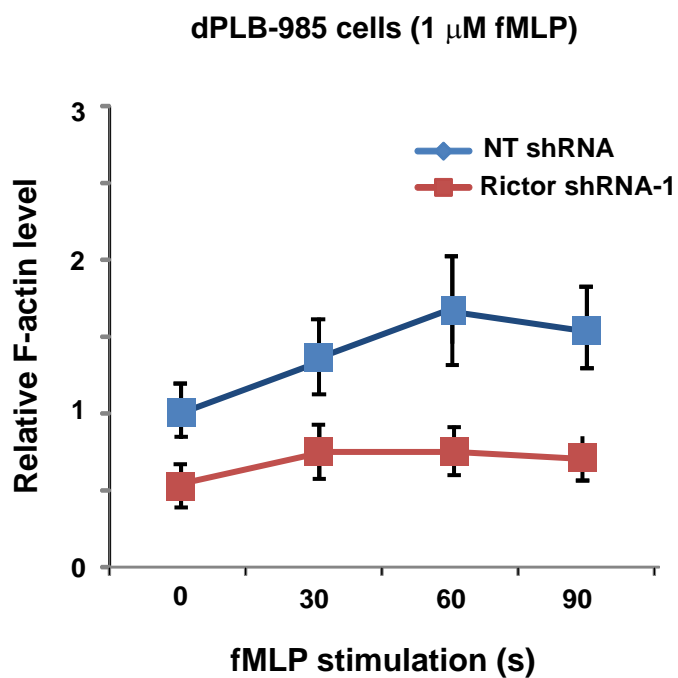

Fig. S5

**A**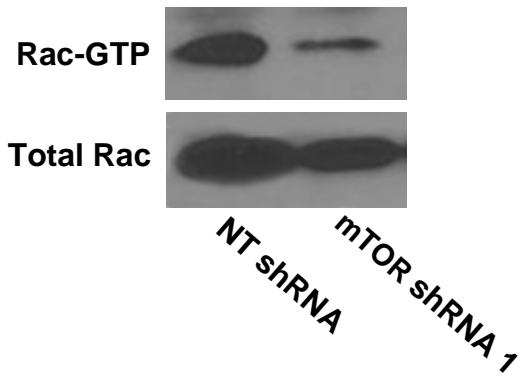**B**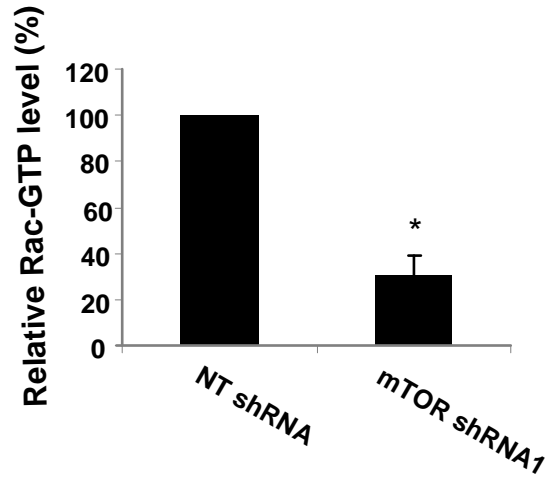**C**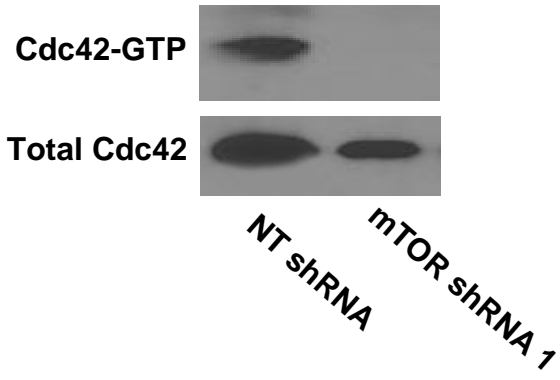**D**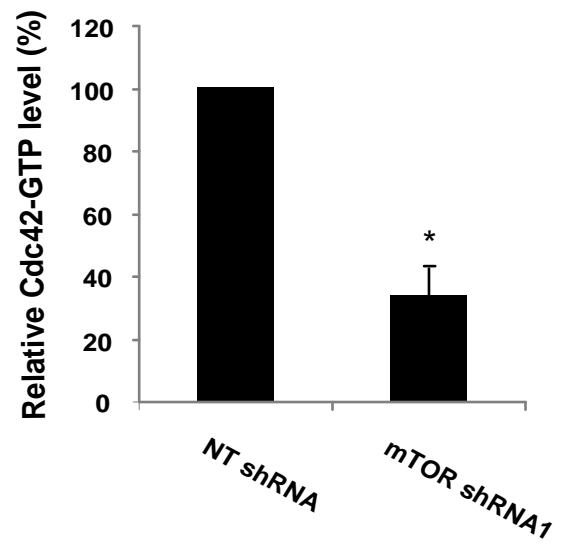

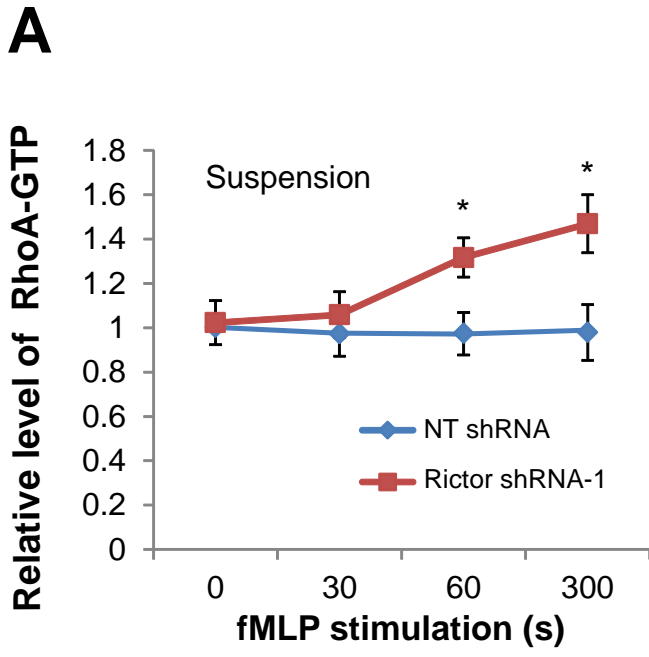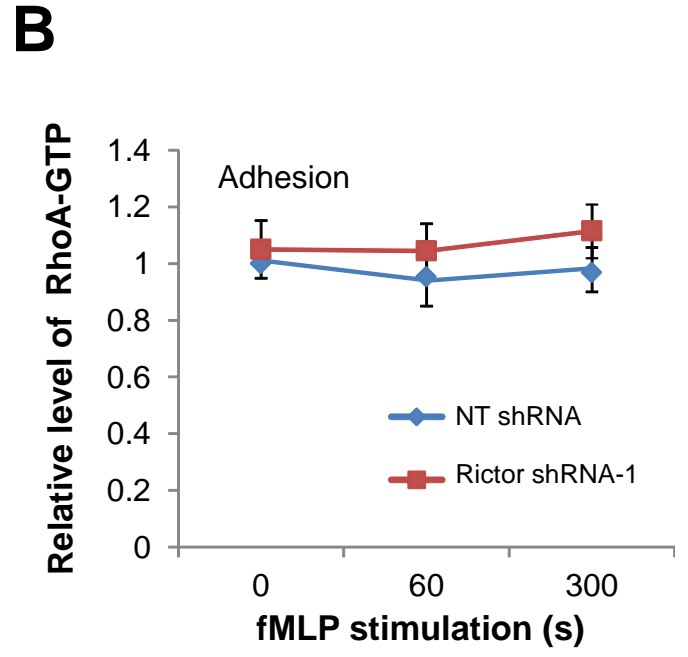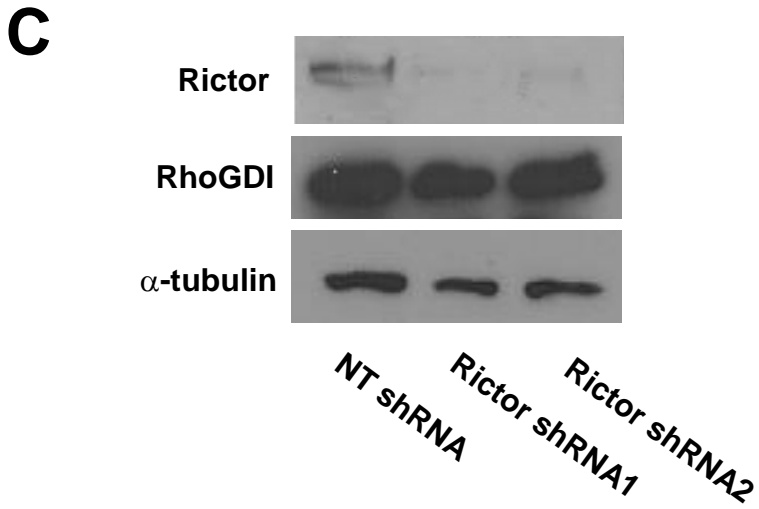

Fig. S7
